# Supplementary material for: An integrated RNAseq-1H NMR metabolomics approach to understand soybean primary metabolism regulation in response to Rhizoctonia foliar blight disease
Source: BMC Plant Biol. 2017 Apr 27;17:84. doi: 10.1186/s12870-017-1020-8 (PMC5408482; doi:10.1186/s12870-017-1020-8)
Supplement: Supplementary file 9 — Metabolite loading coefficients from data integration analysis using O2PLS multivariate analytical methods. (XLSX 64 kb) [file 12870_2017_1020_MOESM9_ESM.xlsx]

## Sheet: Sheet3
Additional file 9: Table S8. Metabolite loading coefficients from first and second latent variables from data integration analysis using O2PLS multivariate analytical methods.
[1] Loading coefficient values for the first latent variable
[2] Loading coefficient values for the second latent variable
[3] Significant latent variables from the first or second latent variables based on previously defined thresholds (see Additional file 7; Table S6)
[4] Metabolite bins detected as significant in both the first and second latent variables
Chemical shift (ppm)	Metabolite ID	M1.c[1]	M1.c[2]
First Latent Variable [3]
[3.9690-4.0288] [4]	L-Serine/Fructose	-115.179	-232.877
[2.2649-2.3219]	GABA	-74.3336	-67.0161
[1.8682-1.9132]	GABA	-71.1926	-62.6918
[0.9205-0.9803]	L-Isoleucine/L-Leucine	-57.4957	69.5038
[4.0288-4.0854] [4]	Myo-inositol/Fructose	-41.7291	16.523
[2.8560-2.9073]	L-Asparagine	-38.5366	-77.9086
[3.6395-3.6862] [4]	Myo-inositol/Fructose	140.642	-201.369
[1.2868-1.3462]	L-Threonine	133.583	135.166
[1.1611-1.2051]	Ethanol	68.7352	-33.9772
[3.1263-3.1851] [4]	[3.1263-3.1851]	56.7188	340.217
[1.5143-1.5741]	[1.5143-1.5741]	52.2542	28.7022
[2.1528-2.2126]	L-Glutamine	46.1128	33.1371
Second Latent Variable [3]
[3.9690-4.0288]	L-Serine/Fructose	-115.179	-232.877
[3.6395-3.6862]	Myo-inositol/Fructose	140.642	-201.369
[3.5684-3.6115]	Fructose	-28.4445	-133.769
[5.2225-5.2738]	D-Glucose	-22.4438	-104.739
[4.1229-4.1827]	[4.1229-4.1827]	-4.17085	-93.5519
[2.9264-2.9547]	L-Asparagine	-36.5056	-80.7447
[3.1263-3.1851]	[3.1263-3.1851]	56.7188	340.217
[3.6862-3.7315]	Fructose/Glucose	-12.5319	167.149
[6.5156-6.5351]	Fumarate	25.6087	141.249
[1.2868-1.3462]	L-Threonine	133.583	135.166
[3.5022-3.5330]	Myo-inositol/Glucose/Fructose	-24.1964	129.813
[3.4576-3.5022]	Glucose	5.85994	129.541
